# Supplementary material for: DeePathology: Deep Multi-Task Learning for Inferring Molecular Pathology from Cancer Transcriptome
Source: PubMed Central journal article supplement (PMC6848155; doi:10.1038/s41598-019-52937-5), 2019-11-11
Supplement: 41598_2019_52937_MOESM1_ESM.pdf [file 41598_2019_52937_MOESM1_ESM.pdf]

**Supplementary Information:**  
**DeePathology: Deep Multi-Task Learning for Inferring  
Molecular Pathology from Cancer Transcriptome**

Behrooz Azarkhalili<sup>1,4</sup>, Ali Saberi<sup>2</sup>, Hamidreza Chitsaz<sup>3</sup>, and Ali Sharifi-Zarchi<sup>2, \*</sup>

<sup>1</sup>Department of Stem Cell Biology and Technology, Royan Institute, Tehran, Iran

<sup>2</sup>Department of Computer Engineering, Sharif University of Technology, Tehran, Iran

<sup>3</sup>Department of Computer Science, Colorado State University, Fort Collins, CO, USA

<sup>4</sup>Department of Mathematics and Computer Science, Sharif University of Technolog, Tehran,  
Iran

\*Corresponding author: [asharifi@sharif.edu](mailto:asharifi@sharif.edu)

Table S1: The number of samples used for each tissue type.

| Tissue        | GDC Data |        |       | DeepPathology 10750 Selection |        |       | 5-Fold Cross Validation Selection |      |       | 5-Fold Cross Validation Selection (Fold #1 to #4) |      |       | 5-Fold Cross Validation Selection (Fold #5) |      |       |
|---------------|----------|--------|-------|-------------------------------|--------|-------|-----------------------------------|------|-------|---------------------------------------------------|------|-------|---------------------------------------------|------|-------|
|               | Tumor    | Normal | Total | Tumor                         | Normal | Total | Train                             | Test | Total | Train                                             | Test | Total | Train                                       | Test | Total |
| Adrenal Gland | 262      | 3      | 265   | 262                           | 3      | 265   | 212                               | 53   | 265   | 212                                               | 53   | 265   | 212                                         | 53   | 265   |
| Bile Duct     | 36       | 9      | 45    | 36                            | 9      | 45    | 36                                | 9    | 45    | 36                                                | 9    | 45    | 36                                          | 9    | 45    |
| Bladder       | 411      | 19     | 430   | 411                           | 19     | 430   | 344                               | 86   | 430   | 344                                               | 86   | 430   | 344                                         | 86   | 430   |
| Blood         | 126      | 0      | 126   | 126                           | 0      | 126   | 101                               | 25   | 126   | 101                                               | 25   | 126   | 100                                         | 26   | 126   |
| Bone Marrow   | 83       | 0      | 83    | 83                            | 0      | 83    | 67                                | 16   | 83    | 67                                                | 16   | 83    | 64                                          | 19   | 83    |
| Brain         | 525      | 0      | 525   | 525                           | 0      | 525   | 420                               | 105  | 525   | 420                                               | 105  | 525   | 420                                         | 105  | 525   |
| Breast        | 1088     | 104    | 1192  | 1088                          | 104    | 1192  | 954                               | 238  | 1192  | 954                                               | 238  | 1192  | 952                                         | 240  | 1192  |
| Cervix        | 306      | 3      | 309   | 306                           | 3      | 309   | 248                               | 61   | 309   | 248                                               | 61   | 309   | 244                                         | 65   | 309   |
| Colorectal    | 611      | 12     | 623   | 611                           | 12     | 623   | 499                               | 124  | 623   | 499                                               | 124  | 623   | 496                                         | 127  | 623   |
| Esophagus     | 162      | 11     | 173   | 162                           | 11     | 173   | 139                               | 34   | 173   | 139                                               | 34   | 173   | 136                                         | 37   | 173   |
| Eye           | 80       | 0      | 80    | 80                            | 0      | 80    | 64                                | 16   | 80    | 64                                                | 16   | 80    | 64                                          | 16   | 80    |
| Head and Neck | 493      | 44     | 537   | 493                           | 44     | 537   | 430                               | 107  | 537   | 430                                               | 107  | 537   | 428                                         | 109  | 537   |
| Kidney        | 964      | 141    | 1105  | 964                           | 141    | 1105  | 884                               | 221  | 1105  | 884                                               | 221  | 1105  | 884                                         | 221  | 1105  |
| Liver         | 370      | 50     | 420   | 370                           | 50     | 420   | 336                               | 84   | 420   | 336                                               | 84   | 420   | 336                                         | 84   | 420   |
| Lung          | 987      | 59     | 1046  | 987                           | 59     | 1046  | 837                               | 209  | 1046  | 837                                               | 209  | 1046  | 836                                         | 210  | 1046  |
| Lymph Nodes   | 47       | 0      | 47    | 47                            | 0      | 47    | 38                                | 9    | 47    | 38                                                | 9    | 47    | 36                                          | 11   | 47    |
| Ovary         | 376      | 0      | 376   | 376                           | 0      | 376   | 301                               | 75   | 376   | 301                                               | 75   | 376   | 300                                         | 76   | 376   |
| Pancreas      | 178      | 4      | 182   | 178                           | 4      | 182   | 146                               | 36   | 182   | 146                                               | 36   | 182   | 144                                         | 38   | 182   |
| Pleura        | 86       | 0      | 86    | 86                            | 0      | 86    | 69                                | 17   | 86    | 69                                                | 17   | 86    | 68                                          | 18   | 86    |
| Prostate      | 495      | 52     | 547   | 495                           | 52     | 547   | 438                               | 109  | 547   | 438                                               | 109  | 547   | 436                                         | 111  | 547   |
| Skin          | 449      | 1      | 450   | 449                           | 1      | 450   | 360                               | 90   | 450   | 360                                               | 90   | 450   | 360                                         | 90   | 450   |
| Soft Tissue   | 261      | 0      | 261   | 261                           | 0      | 261   | 209                               | 52   | 261   | 209                                               | 52   | 261   | 208                                         | 53   | 261   |
| Stomach       | 372      | 32     | 404   | 372                           | 32     | 404   | 324                               | 80   | 404   | 324                                               | 80   | 404   | 320                                         | 84   | 404   |
| Testis        | 156      | 0      | 156   | 156                           | 0      | 156   | 125                               | 31   | 156   | 125                                               | 31   | 156   | 124                                         | 32   | 156   |
| Thyroid       | 119      | 2      | 121   | 119                           | 2      | 121   | 97                                | 24   | 121   | 97                                                | 24   | 121   | 96                                          | 25   | 121   |
| Uterus        | 509      | 58     | 567   | 509                           | 58     | 567   | 454                               | 113  | 567   | 454                                               | 113  | 567   | 452                                         | 115  | 567   |
| All           | 10150    | 637    | 10787 | 10124                         | 626    | 10750 | 8608                              | 2142 | 10750 | 8608                                              | 2142 | 10750 | 8568                                        | 2182 | 10750 |

Table S2: The number of samples used for each cancer type.

| Disease                                                                   | Code   | Project                        | Tissue              | GDC Data     |             | DeepPathology 10750 Selection |              | 5-Fold Cross Validation Selection |             | 5-Fold Cross Validation Selection (Fold #1 to #4) |             | 5-Fold Cross Validation Selection (Fold #5) |              | 5-Fold Cross Validation Selection (Fold #1 to #4) |             |              |
|---------------------------------------------------------------------------|--------|--------------------------------|---------------------|--------------|-------------|-------------------------------|--------------|-----------------------------------|-------------|---------------------------------------------------|-------------|---------------------------------------------|--------------|---------------------------------------------------|-------------|--------------|
|                                                                           |        |                                |                     | Total        | Train       | Test                          | Total        | Train                             | Test        | Total                                             | Train       | Test                                        | Total        | Train                                             | Test        | Total        |
| Acute Myeloid Leukemia                                                    | LAML   | TCGA-LAML + MNGE-LAML          | Bone Marrow + Blood | 209          | 168         | 41                            | 209          | 168                               | 41          | 209                                               | 168         | 41                                          | 209          | 168                                               | 41          | 209          |
| Adrenocortical Carcinoma                                                  | ACC    | TCGA-ACC                       | Adrenal Gland       | 79           | 64          | 15                            | 79           | 64                                | 15          | 79                                                | 64          | 15                                          | 79           | 64                                                | 15          | 79           |
| Bladder Urothelial Carcinoma                                              | BLCA   | TCGA-BLCA                      | Bladder             | 411          | 329         | 82                            | 411          | 329                               | 82          | 411                                               | 329         | 82                                          | 411          | 329                                               | 82          | 411          |
| Brain Lower Grade Glioma                                                  | LGG    | TCGA-LGG                       | Brain               | 525          | 420         | 105                           | 525          | 420                               | 105         | 525                                               | 420         | 105                                         | 525          | 420                                               | 105         | 525          |
| Breast Invasive Carcinoma                                                 | BRCA   | TCGA-BRCA                      | Breast              | 1088         | 871         | 217                           | 1088         | 871                               | 217         | 1088                                              | 871         | 217                                         | 1088         | 871                                               | 217         | 1088         |
| Cervical Squamous Cell Carcinoma and Endocervical Squamous Cell Carcinoma | CESC   | TCGA-CESC                      | Cervix              | 306          | 245         | 61                            | 306          | 245                               | 61          | 306                                               | 245         | 61                                          | 306          | 245                                               | 61          | 306          |
| Cholangiocarcinoma                                                        | CHOL   | TCGA-CHOL                      | Bile Duct           | 36           | 29          | 7                             | 36           | 29                                | 7           | 36                                                | 29          | 7                                           | 36           | 29                                                | 7           | 36           |
| Colon Adenocarcinoma                                                      | COAD   | TCGA-COAD                      | Colorectal          | 451          | 361         | 90                            | 451          | 361                               | 90          | 451                                               | 361         | 90                                          | 451          | 361                                               | 90          | 451          |
| Esophageal Carcinoma                                                      | ESCA   | TCGA-ESCA                      | Esophagus           | 162          | 130         | 32                            | 162          | 130                               | 32          | 162                                               | 130         | 32                                          | 162          | 130                                               | 32          | 162          |
| Head and Neck Squamous Cell Carcinoma                                     | HNSC   | TCGA-HNSC                      | Head and Neck       | 493          | 395         | 98                            | 493          | 395                               | 98          | 493                                               | 395         | 98                                          | 493          | 395                                               | 98          | 493          |
| High-Risk Wilms Tumor                                                     | WTLU   | TARGET-WT                      | Kidney              | 122          | 98          | 24                            | 122          | 98                                | 24          | 122                                               | 98          | 24                                          | 122          | 98                                                | 24          | 122          |
| Kidney Chromophobe                                                        | KIPAN  | TCGA-KIPAN                     | Kidney              | 65           | 52          | 13                            | 65           | 52                                | 13          | 65                                                | 52          | 13                                          | 65           | 52                                                | 13          | 65           |
| Kidney Renal Clear Cell Carcinoma                                         | KIPCC  | TCGA-KIPCC                     | Kidney              | 492          | 394         | 98                            | 492          | 394                               | 98          | 492                                               | 394         | 98                                          | 492          | 394                                               | 98          | 492          |
| Kidney Renal Papillary Cell Carcinoma                                     | KIPRP  | TCGA-KIPRP                     | Kidney              | 285          | 228         | 57                            | 285          | 228                               | 57          | 285                                               | 228         | 57                                          | 285          | 228                                               | 57          | 285          |
| Liver Hepatocellular Carcinoma                                            | LHC    | TCGA-LHC                       | Liver               | 370          | 296         | 74                            | 370          | 296                               | 74          | 370                                               | 296         | 74                                          | 370          | 296                                               | 74          | 370          |
| Liver Adenocarcinoma                                                      | LIAD   | TCGA-LIAD                      | Liver               | 512          | 410         | 102                           | 512          | 410                               | 102         | 512                                               | 410         | 102                                         | 512          | 410                                               | 102         | 512          |
| Lung Squamous Cell Carcinoma                                              | LUSC   | TCGA-LUSC                      | Lung                | 475          | 380         | 95                            | 475          | 380                               | 95          | 475                                               | 380         | 95                                          | 475          | 380                                               | 95          | 475          |
| Lymphoid Neoplasm Diffuse Large B-cell Lymphoma                           | LUSC   | TCGA-LUSC                      | Lymph Nodes         | 47           | 38          | 9                             | 47           | 38                                | 9           | 47                                                | 38          | 9                                           | 47           | 38                                                | 9           | 47           |
| Mesothelioma                                                              | MESO   | TCGA-MESO                      | Pleura              | 86           | 69          | 17                            | 86           | 69                                | 17          | 86                                                | 69          | 17                                          | 86           | 69                                                | 17          | 86           |
| Normal                                                                    | Normal | Normal Samples of All Projects | All                 | 637          | 501         | 125                           | 637          | 501                               | 125         | 637                                               | 501         | 125                                         | 637          | 501                                               | 125         | 637          |
| Ovarian Serous Cystadenocarcinoma                                         | OV     | TCGA-OV                        | Ovary               | 376          | 301         | 75                            | 376          | 301                               | 75          | 376                                               | 301         | 75                                          | 376          | 301                                               | 75          | 376          |
| Pancreatic Adenocarcinoma                                                 | PAAD   | TCGA-PAAD                      | Pancreas            | 178          | 143         | 35                            | 178          | 143                               | 35          | 178                                               | 143         | 35                                          | 178          | 143                                               | 35          | 178          |
| Pheochromocytoma and Paraganglioma                                        | PCPG   | TCGA-PCPG                      | Adrenal Gland       | 183          | 147         | 36                            | 183          | 147                               | 36          | 183                                               | 147         | 36                                          | 183          | 147                                               | 36          | 183          |
| Prostate Adenocarcinoma                                                   | PRAD   | TCGA-PRAD                      | Prostate            | 495          | 396         | 99                            | 495          | 396                               | 99          | 495                                               | 396         | 99                                          | 495          | 396                                               | 99          | 495          |
| Rectum Adenocarcinoma                                                     | READ   | TCGA-READ                      | Colorectal          | 160          | 128         | 32                            | 160          | 128                               | 32          | 160                                               | 128         | 32                                          | 160          | 128                                               | 32          | 160          |
| Sarcoma                                                                   | SARC   | TCGA-SARC                      | Soft Tissue         | 261          | 209         | 52                            | 261          | 209                               | 52          | 261                                               | 209         | 52                                          | 261          | 209                                               | 52          | 261          |
| Skin Cutaneous Melanoma                                                   | SKCM   | TCGA-SKCM                      | Skin                | 449          | 360         | 89                            | 449          | 360                               | 89          | 449                                               | 360         | 89                                          | 449          | 360                                               | 89          | 449          |
| Stomach Adenocarcinoma                                                    | STAD   | TCGA-STAD                      | Stomach             | 372          | 298         | 74                            | 372          | 298                               | 74          | 372                                               | 298         | 74                                          | 372          | 298                                               | 74          | 372          |
| Testicular Germ Cell Tumors                                               | TGCT   | TCGA-TGCT                      | Testis              | 156          | 125         | 31                            | 156          | 125                               | 31          | 156                                               | 125         | 31                                          | 156          | 125                                               | 31          | 156          |
| Thymoma                                                                   | THYM   | TCGA-THYM                      | Thymus              | 119          | 96          | 23                            | 119          | 96                                | 23          | 119                                               | 96          | 23                                          | 119          | 96                                                | 23          | 119          |
| Thyroid Carcinoma                                                         | THCA   | TCGA-THCA                      | Thyroid             | 509          | 408         | 101                           | 509          | 408                               | 101         | 509                                               | 408         | 101                                         | 509          | 408                                               | 101         | 509          |
| Uterine Carcinoma                                                         | UCEC   | TCGA-UCEC                      | Uterus              | 56           | 45          | 11                            | 56           | 45                                | 11          | 56                                                | 45          | 11                                          | 56           | 45                                                | 11          | 56           |
| Uterine Corpus Endometrial Carcinoma                                      | UCEC   | TCGA-UCEC                      | Uterus              | 542          | 413         | 103                           | 542          | 413                               | 103         | 542                                               | 413         | 103                                         | 542          | 413                                               | 103         | 542          |
| Uveal Melanoma                                                            | UVM    | TCGA-UVM                       | Eye                 | 80           | 64          | 16                            | 80           | 64                                | 16          | 80                                                | 64          | 16                                          | 80           | 64                                                | 16          | 80           |
| <b>All</b>                                                                |        |                                |                     | <b>10787</b> | <b>8611</b> | <b>2139</b>                   | <b>10750</b> | <b>8611</b>                       | <b>2139</b> | <b>10750</b>                                      | <b>8611</b> | <b>2139</b>                                 | <b>10750</b> | <b>8556</b>                                       | <b>2194</b> | <b>10750</b> |

Table S3: Sensitivity, specificity, F1 metric and balanced accuracy of DNN classification for each tissue.

| Tissue        | Sensitivity | Specificity | F1    | Balanced Accuracy |
|---------------|-------------|-------------|-------|-------------------|
| Adrenal Gland | 0.975       | 1           | 0.964 | 0.987             |
| Bile Duct     | 0.878       | 0.756       | 0.857 | 0.817             |
| Bladder       | 0.965       | 0.959       | 0.993 | 0.962             |
| Blood         | 1           | 1           | 1     | 1                 |
| Bone Marrow   | 0.988       | 1           | 0.994 | 0.994             |
| Brain         | 1           | 1           | 1     | 1                 |
| Breast        | 0.998       | 0.992       | 0.991 | 0.995             |
| Cervix        | 0.977       | 0.951       | 0.982 | 0.964             |
| Colorectal    | 0.998       | 0.996       | 0.991 | 0.997             |
| Esophagus     | 0.913       | 0.965       | 0.916 | 0.924             |
| Eye           | 0.991       | 0.997       | 0.988 | 0.994             |
| Head and Neck | 0.989       | 0.965       | 0.981 | 0.977             |
| Kidney        | 0.997       | 0.995       | 0.997 | 0.996             |
| Liver         | 0.992       | 0.976       | 0.981 | 0.984             |
| Lung          | 0.984       | 0.99        | 0.986 | 0.987             |
| Lymph Nodes   | 1           | 1           | 1     | 1                 |
| Ovary         | 0.999       | 1           | 0.992 | 0.999             |
| Pancreas      | 0.984       | 0.976       | 0.978 | 0.98              |
| Pleura        | 0.977       | 0.965       | 0.988 | 0.971             |
| Prostate      | 1           | 1           | 1     | 1                 |
| Skin          | 0.98        | 0.992       | 0.987 | 0.986             |
| Soft Tissue   | 0.977       | 0.963       | 0.971 | 0.97              |
| Stomach       | 0.96        | 0.972       | 0.962 | 0.966             |
| Testis        | 1           | 1           | 1     | 1                 |
| Thymus        | 0.997       | 0.987       | 0.989 | 0.992             |
| Thyroid       | 1           | 0.998       | 0.998 | 0.999             |
| Uterus        | 0.991       | 0.995       | 0.992 | 0.993             |

Table S4: Sensitivity, specificity, F1 metric and balanced accuracy of DNN classification for each disease type.

| Disease | Sensitivity | Specificity | F1    | Balanced Accuracy |
|---------|-------------|-------------|-------|-------------------|
| LAML    | 0.939       | 0.998       | 0.964 | 0.968             |
| ACC     | 1           | 1           | 1     | 1                 |
| BLCA    | 0.986       | 1           | 0.981 | 0.993             |
| LGG     | 0.718       | 0.999       | 0.811 | 0.859             |
| BRCA    | 0.9         | 0.991       | 0.882 | 0.946             |
| CESC    | 0.854       | 0.998       | 0.847 | 0.926             |
| CHOL    | 0.994       | 1           | 0.992 | 0.997             |
| COAD    | 0.95        | 0.997       | 0.954 | 0.973             |
| ESCA    | 0.883       | 0.999       | 0.864 | 0.941             |
| HNSC    | 0.943       | 0.998       | 0.934 | 0.971             |
| WITU    | 0.966       | 0.999       | 0.974 | 0.981             |
| KICH    | 0.922       | 0.995       | 0.91  | 0.958             |
| KIRC    | 0.893       | 0.991       | 0.883 | 0.944             |
| KIRP    | 1           | 1           | 1     | 1                 |
| LIHC    | 0.943       | 1           | 0.923 | 0.971             |
| LUAD    | 0.836       | 0.991       | 0.858 | 0.913             |
| LUSC    | 0.995       | 1           | 0.989 | 0.997             |
| DLBC    | 0.966       | 0.995       | 0.949 | 0.982             |
| MESO    | 0.513       | 0.996       | 0.556 | 0.754             |
| Normal  | 0.929       | 0.998       | 0.936 | 0.958             |
| OV      | 0.978       | 1           | 0.956 | 0.989             |
| PAAD    | 0.975       | 0.999       | 0.951 | 0.987             |
| PCPG    | 0.936       | 1           | 0.912 | 0.968             |
| PRAD    | 0.943       | 0.999       | 0.94  | 0.97              |
| READ    | 0.975       | 1           | 0.965 | 0.987             |
| SARC    | 0.93        | 0.997       | 0.91  | 0.964             |
| SKCM    | 0.976       | 0.999       | 0.964 | 0.987             |
| STAD    | 1           | 1           | 1     | 1                 |
| TGCT    | 0.991       | 1           | 0.983 | 0.997             |
| THYM    | 0.982       | 0.999       | 0.986 | 0.991             |
| THCA    | 0.797       | 0.999       | 0.743 | 0.898             |
| UCS     | 0.976       | 0.998       | 0.964 | 0.987             |
| UCEC    | 0.991       | 1           | 0.989 | 0.994             |
| UVM     | 0.955       | 0.998       | 0.935 | 0.977             |

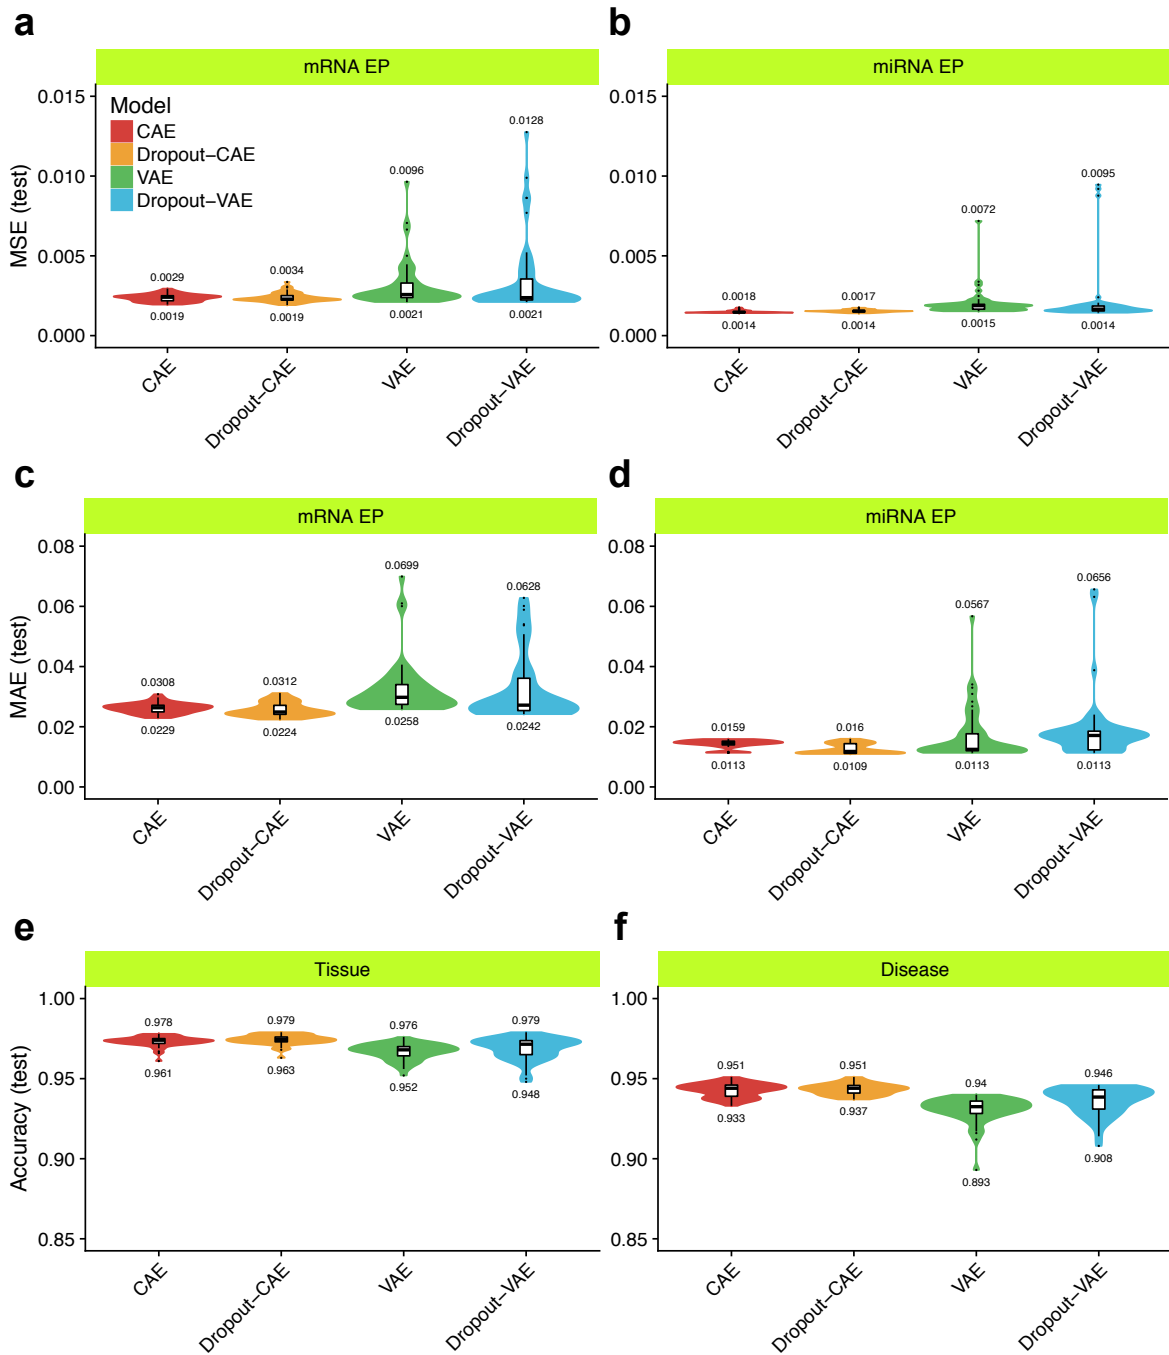

Figure S1: Distribution of different error or accuracy measurements during hyperparameter optimization: (a) mean square error (MSE) of reproducing mRNA expression profiles (EP), (b) MSE of generating miRNA expression profiles, (c) mean absolute error (MAE) of reproducing mRNA EP, (d) MAE of reproducing miRNA EP, (e) accuracy of predicting tissue for the test dataset, (f) accuracy of predicting cancer type for the test dataset. In each violin plot, the colors represent different architectures.

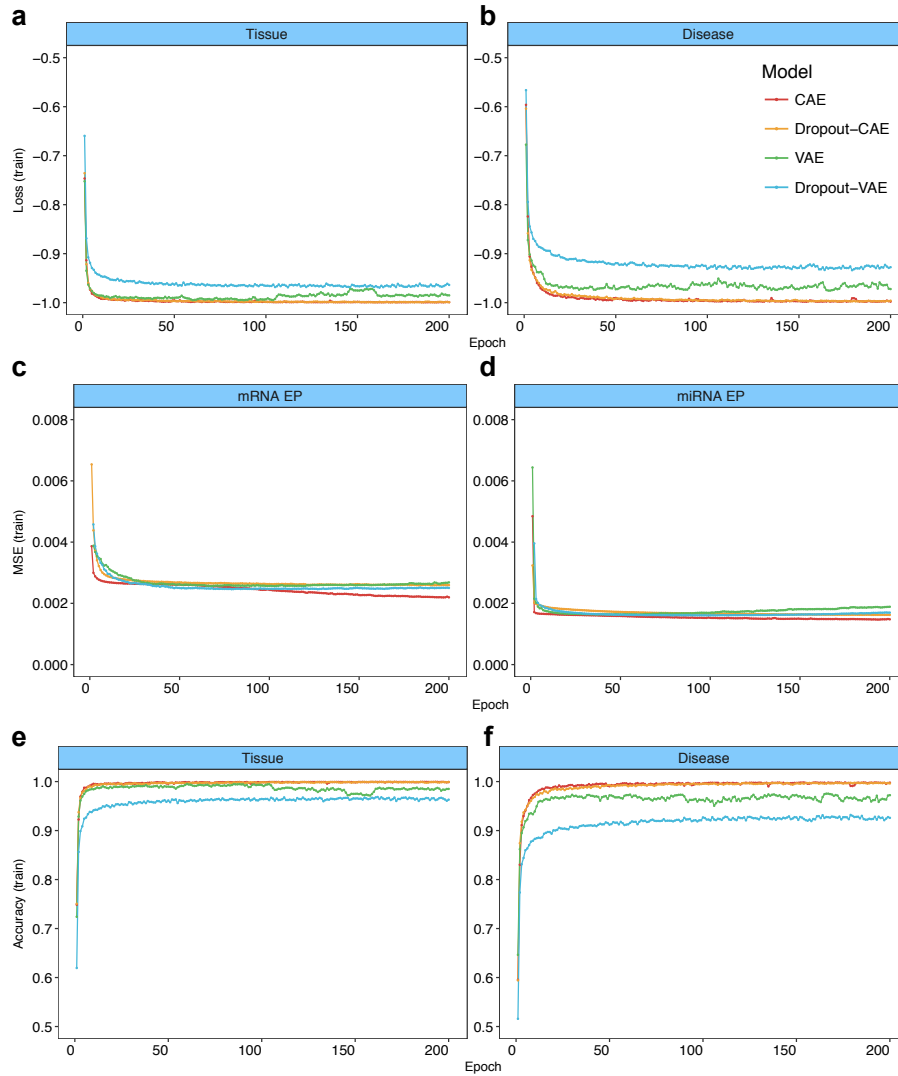

Figure S2: Performance of DNNs on training data, during 200 epochs of training. In each plot, the x-axis shows the training epochs, and the y-axis shows: **(a)** the value of loss function for predicting tissue type, **(b)** the value of loss function for predicting disease state, **(c)** mean square error (MSE) of reproducing mRNA expression profiles (EP), **(d)** MSE of predicting miRNA EP, **(e)** accuracy of predicting tissue, and **(f)** accuracy of predicting cancer type. All results are based on the training dataset.

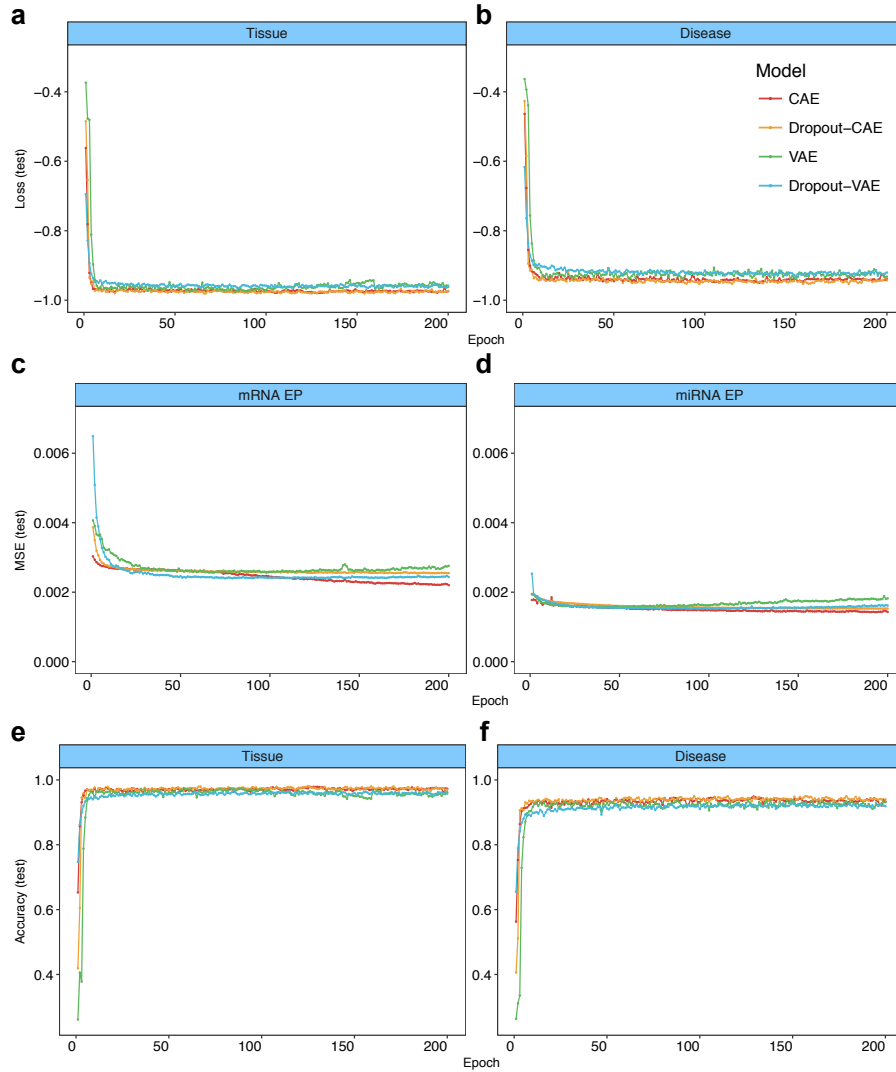

Figure S3: Performance of DNNs on test data, during 200 epochs of training. In each plot, the x-axis shows the training epochs, and the y-axis shows: **(a)** the value of loss function for predicting tissue type, **(b)** the value of loss function for predicting disease state, **(c)** mean square error (MSE) of reproducing mRNA expression profiles (EP), **(d)** MSE of predicting miRNA EP, **(e)** accuracy of predicting tissue, and **(f)** accuracy of predicting cancer type. All results are based on the test dataset.



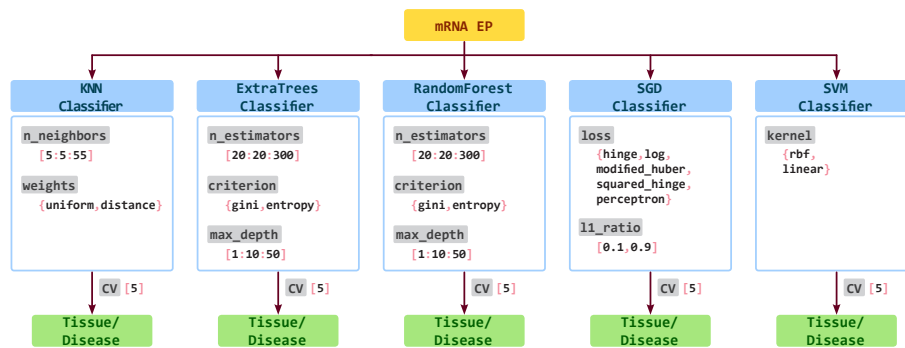

Figure S4: Hyperparameter optimization of the other classification algorithms. Here the notation  $[start : step : end]$  return evenly spaced values within the close interval  $[start, stop]$  with increments equal to  $step$ . A dictionary  $\{a, b, c\}$  means that all of the item  $a$ ,  $b$ , and  $c$  can be selected in the Bayesian optimization process.

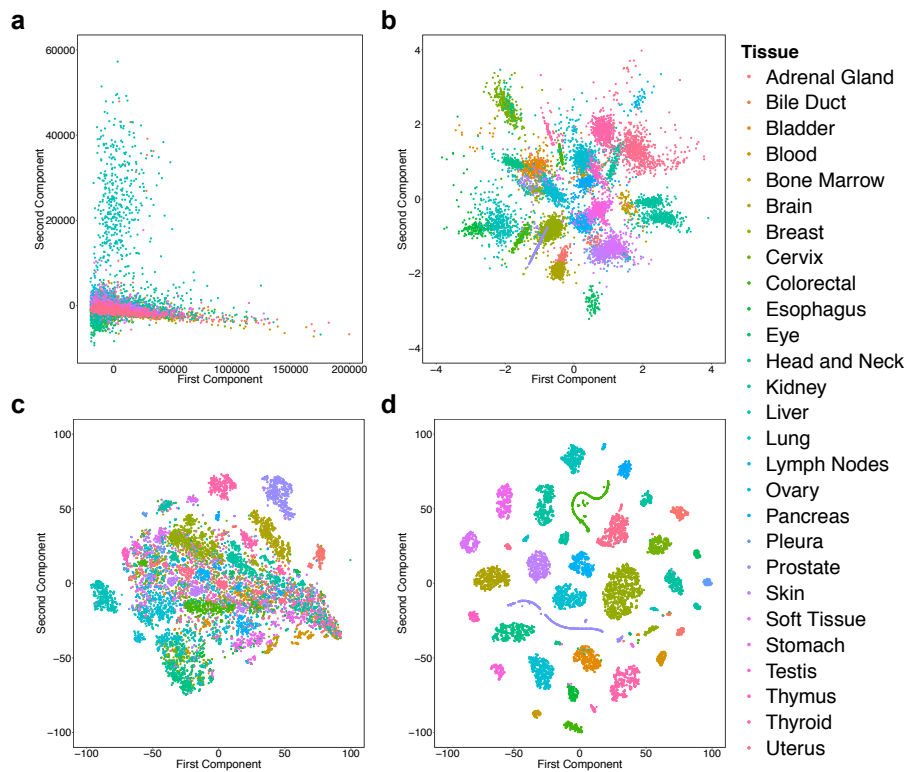

Figure S5: Discrimination of sample tissues in the original and Cell Identity Codes (CIC) spaces. (a) PCA plot of the original mRNA expression profiles of all samples. Each dot and its color show a sample and its tissue type, respectively. (b) PCA plot of the 8-dimensional CIC space. (c) t-SNE plot of the original mRNA expression profiles. (d) t-SNE plot of the 8-dimensional CIC space.
